[Scientific Solutions]

Comparison Of respiratory protection during exercising tasks between different wearing methods of replaceable particulate respirators and powered air-purifying respirators

Short title: comparison between replaceable particulate respirators and powered air-purifying respirators

Hiroka Baba, Hajime Ando\*, Kazunori Ikegami, Shingo Sekoguchi, Taiki Shirasaka, Akira Ogami

Department of Work Systems and Health, Institute of Industrial Ecological Sciences,

University of Occupational and Environmental Health, Japan

1-1, Iseigaoka, Yahata-nishi-ku, Kitakyushu, Fukuoka 807-8555, Japan

Tel: +81-93-691-7471, Fax: +81-93-601-2667

\*Corresponding author

Hajime Ando

1-1, Iseigaoka, Yahata-nishi-ku, Kitakyushu, Fukuoka 807-8555, Japan

Tel: +81-93-691-7471, Fax: +81-93-601-2667

E-mail: h-ando@med.uoeh-u.ac.jp

Short title: comparison between replaceable particulate respirators and powered air-purifying respirators

#### Author Biographies

Hiroka Baba is a postgraduate student at the University of Occupational and Environmental Health, Japan. Her research focuses on health management in telecommuting.

Hajime Ando is a research associate at the Department of Work System and Health at the University of Occupational and Environmental Health, Japan. He has a PhD in occupational health from the University of Occupational and Environmental Health, Japan. He surveyed the relationship between chronic pain and working hours.

Kazunori Ikegami is an associate professor at the Department of Work System and Health at the University of Occupational and Environmental Health, Japan. He obtained a doctoral degree in medicine from the University of Occupational and Environmental Health, Japan. His interests include occupational health in small and medium enterprises and health

management in telecommuting.

Shingo Sekoguchi is a postgraduate student at the University of Occupational and Environmental Health, Japan. His research focuses on particle respirators and particle monitors.

Taiki Shirasaka has a master's degree in occupational health from the University of Occupational and Environmental Health, Japan. He surveyed the wearing method of respiratory protective equipment at the workplace.

Akira Ogami is a professor at the Department of Work System and Health at the University of Occupational and Environmental Health, Japan. He obtained a PhD in medicine from the University of Occupational and Environmental Health, Japan. His interests include the health effects of toner particles and health management with personal health records.

## **Abstract**

This study evaluated the differences in respiratory protection between replaceable particulate respirators (RPRs) and powered air-purifying respirators (PAPRs), with different wearing methods, during exercising tasks. Participants wore RPRs or PAPRs in the ways that workers wore them in actual workplaces. We measured the fit factor (FF) of respiratory protective equipment (RPE) during exercising tasks for each wearing variation. The FF of RPRs in the exercise state was significantly lower than that in the resting state, indicating inadequate respiratory protection. In contrast, the FF of PAPRs during exercising tasks was significantly lower than that at rest; however, respiratory protection was maintained. PAPR did not show a significant decrease in FF owing to the wearing variations during exercising tasks. In conclusion, PAPRs were found to be superior to RPRs in terms of respiratory protection. PAPRs are better than RPRs for workers who have to wear RPE inappropriately due to health problems.

**Key words:** Particulate respirator, Powered air-purifying respirator, Fit factor, Respiratory disease

## **Introduction**

The number of cases of pneumoconiosis and occupational diseases due to complications of

pneumoconiosis in Japan decreased to 164 in 2019; however, new cases are still occurring.<sup>1</sup>

It is necessary to implement technical and work control measures to reduce the risk of pneumoconiosis and its complications. If such measures are not sufficient to reduce hazards, it is important to wear respiratory protective equipment (RPE), which helps to reduce workers' exposure to dust and toxic chemicals by inhalation and to prevent various occupational diseases. However, previous studies have shown that wearing methods that do not allow sufficient adhesion between the face and the RPE does not provide adequate respiratory protection.<sup>2,3</sup> For this reason, in Japan, the Ministry of Health, Labour and Welfare (MHLW) has issued guidelines on matters to be considered in the selection and use of RPE.<sup>4</sup> Previous studies have shown that those working in dusty workplaces in Japan wear RPE using various methods. We found that RPE was worn in several inappropriate ways, such as by wearing a tightening strap over the helmet or by wearing RPE over a towel wrapped around the face in hot workplace environments.<sup>5</sup> When the respiratory protection capacity of RPE is reduced, inhalation of dust, toxic chemicals, etc. can lead to the development of respiratory diseases such as pneumoconiosis and lung cancer. Prior to this study, we evaluated the difference in protective performance between replaceable particulate respirators (RPRs) and powered air-purifying respirators (PAPRs) by having the participants wear them in various ways in a laboratory at rest. In this previous study, the average leakage rate at rest for RPR ranged from 1.82% to 10.92%, and that for PAPR ranged from 0.18% to

0.42%. Under the rest condition, while there was a decrease in respiratory protection with RPR use due to differences in wearing methods, no significant decrease in respiratory protection was observed with PAPR use due to differences in wearing methods. This indicates that PAPRs can provide sufficient protection for workers who are unable to wear RPRs appropriately due to the work environment.<sup>6</sup> Since PAPRs maintained high respiratory protection regardless of the wearing method in a previous study that examined the effect of the wearing method on respiratory protection at rest, we thought it might be possible to maintain high respiratory protection even while workload. In this previous study, we were unable to verify the effect of workload on respiratory protection. Therefore, we thought it is important to verify the effect of RPE on respiratory protection during workload, depending on the method of wearing RPE among workers. The purpose of this study was to measure the fit factor (FF) of RPRs and PAPRs during workload, in a laboratory, using various wearing methods, and to clarify the differences in respiratory protection and the wearing methods that maintain adequate respiratory protection.

## **Methods**

### ***Study design and setting***

We conducted a crossover comparison study of 10 participants who agreed to participate in the experiment. Two physical states (resting and exercise state) were used to measure the FF

of each combination (hereafter called “wearing variation”) of the RPE type and wearing method.

FF is the numerical result of a quantitative fit test performed on an RPE face piece, which indicates the effectiveness of the seal against the face.

The experiment was conducted from August to September 2018 in an artificial climate chamber at the University of Occupational and Environmental Health, Japan, to exclude environmental influences. The climatic conditions in the artificial climate chamber were set to maintain a room temperature of 20°C and a relative humidity of 50%.

### ***Participants***

We recruited participants from the University of Occupational and Environmental Health, Japan. All participants were healthy adults over 20 years old and were non-smokers, to prevent tobacco dust from affecting the leakage rate measurement. Ten participants, eight males (mean age (SD): 32.1 [3.98] years) and two females (mean age [SD]: 34.0 [5.0] years), were eligible for this study.

### ***Particulate respirator***

The RPR selected for testing was the 1180–05 (Koken Ltd.), and the PAPR was the BL–321S (Koken Ltd). The RPR used was a model that complied with RL2, and the particulate

filtering efficiency according to the Japanese standard for dust mask <sup>7</sup> is 95%.

PAPR used was a model that complied with PL1, and the particulate filtering efficiency in the Japanese standard for PAPRs is 95%. <sup>8</sup> The PAPR used had the following capacity: motor blower capacity: large airflow volume type (over 138 L/min), leakage rate: B class (less than 5.0%), filtering efficiency: PL 1 (over 95.0%). The RPR selected for testing was the 1180-05 (Koken Ltd., Japan), filtering efficiency: RL 2 (over 95.0%). This RPR consisted of a half facepiece and a single filter with a shape similar to that of the BL-321S.

To minimize the influence of individual RPE fitting techniques, the participants used a mirror to standardize the fitting procedure. The tightness of the fastening straps was measured with a measuring instrument using a Sensor Interchangeable Amplifier (force gauge) (eZT, IMADA CO., LTD, Japan). The tightness of the fastening straps was adjusted so that the force with which the fastening straps of the RPE pressurized the head was uniform.

### ***Wearing variations***

The method of wearing the RPEs was based on the commonly observed method of wearing them in the workplace, <sup>5</sup> which was revealed in our previous study. They were as follows: the recommended method (R), in which the headband was placed on the area from the parietal region to the occipital region, with nothing between the facepiece cushion and the face; the method in which a knit cover is placed between the facepiece cushion and the face (K); and



the method in which the headband was placed over a helmet (H). Figure 1 shows an image of the wearing methods.

We represented wearing variation as the combination of “RPR” or “PAPR” and “wearing method.” For example, a PAPR worn according to the recommended method (R) was represented with PAPR-R. We conducted an experiment with six wearing variations. Finally, we set RPR-R, RPR-K, RPR-H, PAPR-R, PAPR-K, and PAPR-H as the six wearing variations.

### ***Measurement procedure***

We measured the FF of the RPE at two physical states, resting and exercise for six different wearing variations. We reported the experimental data of the resting state in a previous study.

<sup>6</sup> The exercise state was set to exercise with an ergometer set at an 80 W load. The order of the FF measurements for each wearing variation was assigned using a random number table.

Figure 2 illustrates the measurement procedure.

| <b>Wearing variations</b> |                                          |      |        |                                           |      |        |
|---------------------------|------------------------------------------|------|--------|-------------------------------------------|------|--------|
| Respirators               | Powered air-purifying respirators (PAPR) |      |        | Replaceable particulate respirators (RPR) |      |        |
|                           | Recommended                              | Knit | Helmet | Recommended                               | Knit | Helmet |

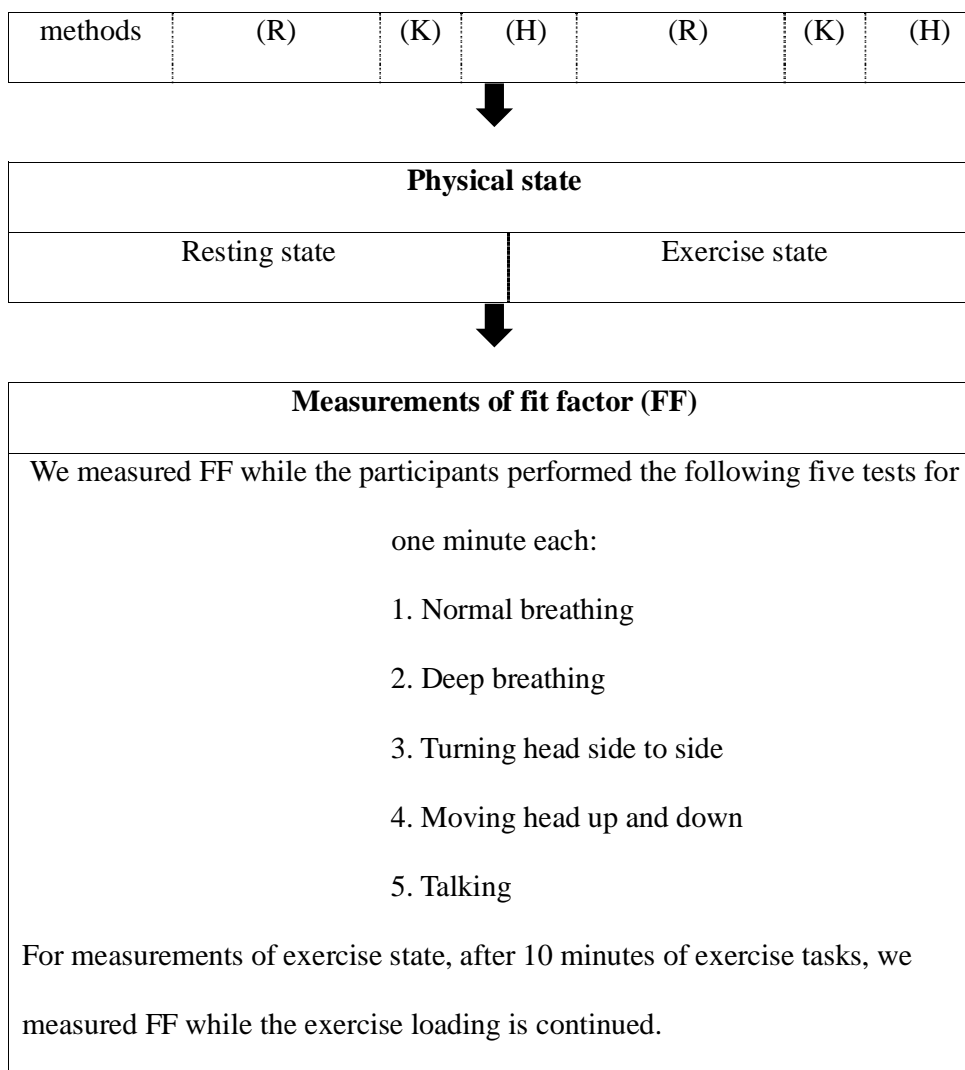

**Figure 1 Outline of the study**

### *Measurement of fit factor*

To measure FF, the participants wore the particulate respirator and performed five actions (1.

Normal breathing, 2. Deep breathing, 3. Turning the head side-to-side: 4. Moving head up

and down, and 5. Talking). Each action was performed for 1 min. For measurements of

exercise state, after 10 minutes of exercise tasks, we measured FF while the exercise loading is continued. The measurement device measured the concentration of atmospheric dust inside and outside the particulate respirator.

The fit testing procedure according to the occupational safety and health administration (OSHA) specifies that seven motions should be performed to measure the FF.<sup>9</sup> However, because the measurement was to be performed while exercising tasks, the five motions of the Japan Industrial Standard (JIS) T8150 in 2018 were adopted for safety reasons.<sup>10</sup> To avoid any influence on the measurements due to the fatigue in the participants, FF measurements while exercising tasks were limited to two times per day, with an interval of at least one hour.

### ***Measurement apparatus of fit factor***

The leakage rate was measured using an MT-03 device (Sibata Scientific Technology Ltd.), which uses a light scattering system particle counter for the detection part and counts the particles present in the air inside and outside the RPE sucked at 1 l/min. After measuring the air outside the RPE for 17 s, the instrument measured the air inside the RPE for 17 s. The replacement time for the dust remaining in the pipe at the start of the measurement and when switching the measurement path was set to 10 s. The time required for each measurement was approximately 1 min. The particles measured by the device were atmospheric dust with a

particle size of at least 0.5  $\mu\text{m}$ . During the measurement, incense sticks were burned to maintain a level of dust in an environment of more than 1000 counts/3 s, which is the recommended value for MT-03. The concentration within the RPE was measured by sampling the air inside the facepiece using a tube joint set fixed to the sampling tube and the RPE. The concentration outside the RPE was measured by sampling the air outside the RPE using a sampling tube fixed with a string hung from the ceiling so that the end of the sampling tube was close to the RPE.

### ***Calculating the fit factor***

According to JIS T8150<sup>10</sup> or fit testing procedure by OSHA,<sup>9</sup> the FF was calculated by dividing the concentration within the particulate respirator ( $N_i$ ) by the concentration outside it ( $N_o$ ):

$$\text{Fit factor} = \frac{\text{Number of test exercises}}{N_i/N_{o_1} + N_i/N_{o_2} + N_i/N_{o_3} + N_i/N_{o_4} + N_i/N_{o_5}}$$

The numbers from 1 to 5 represent test exercises 1-5.

OSHA indicated that the test participant should not be permitted to wear a half mask or quarter facepiece respirator unless a minimum FF of 100 is obtained.<sup>9</sup> In this study, we used  $\text{FF} \geq 100$  as the criterion to ensure that respiratory protection was maintained.

### ***Variables***

The outcome variable was FF, and the predictor variables were physical state (resting state and exercise state) and wearing variations. We adjusted for sex as a confounding factor.

### ***Statistical methods***

Data were analyzed after they were log-transformed with a linear mixed model (LMM), with FF as the dependent variable. Among the independent variables, the random factor was the survey participants, and the fixed factors were sex, physical states, wearing variations, and interaction between physical states and wearing variations. The Bonferroni method was used for multiple comparisons. The estimated marginal means (EMM) by physical states or wearing variations were calculated by adjusting for the dependent variable of LMM. All statistical analyses were performed using the IBM SPSS Statistics 23.0. The significance level was set at  $p < 0.05$ .

## **Results**

### ***Fit factor according to physical states and wearing variations***

Table 1 shows the number of cases with  $FF > 100$  and the mean (SD) of FF for each physical condition and wearing variation.

We could not observe cases of  $FF \geq 100$  when the participants wore the RPE by RPR\_K. The number of cases with  $FF \geq 100$  was higher when wearing the PAPR than when wearing the

RPR in both the resting state and exercise state. In each of the three methods, when wearing the PAPR in the resting state, the FF was  $\geq 100$ ; however, 1 case of 10 when wearing the PAPR in exercise state had FF  $< 100$ . The mean values (SD) of FF were also higher when wearing the PAPR than when wearing the RPR, and it was higher in the resting state than in the exercise state.

**Table 1 Number of cases with FF > 100 and the mean (SD) of FF for each physical condition and wearing variation.**

| Wearing variations | Fit factor         |       |         |                    |       |         |
|--------------------|--------------------|-------|---------|--------------------|-------|---------|
|                    | Resting state      |       |         | Exercise state     |       |         |
|                    | # of FF $\geq$ 100 | M     | SD      | # of FF $\geq$ 100 | M     | SD      |
| RPR_H              | 3                  | 118.7 | (111.8) | 2                  | 68.2  | (55.4)  |
| RPR_K              | 0                  | 12.3  | (5.5)   | 0                  | 9.3   | (4.7)   |
| RPR_R              | 4                  | 145.3 | (141.1) | 3                  | 84.8  | (75.6)  |
| PAPR_H             | 10                 | 737.2 | (408.8) | 9                  | 468.7 | (284.3) |
| PAPR_K             | 10                 | 762.4 | (357.0) | 9                  | 396.6 | (282.0) |
| PAPR_R             | 10                 | 786.5 | (375.7) | 9                  | 444.5 | (326.9) |

# of FF  $\geq 100$

*Comparisons of the values of fit factor by physical states and wearing variations*

Table 2 shows the results of the statistical comparison of the values of FF by physical states and wearing variations. We analyzed the interactions between the physical states and wearing variations. The value of FF was significantly lower when the RPE was worn in the exercise state than when it was worn in the resting state. The FF was significantly the lowest when RPE was applied by RPR\_K among all wearing variations. When fitted by RPR\_R and RPR\_H, the FF was significantly lower than when the PAPR was worn.

No significant difference in FF values was observed when the PAPR was worn by PAPR\_H, PAPR\_K, and PAPR\_R. There was no significant interaction between physical state and wearing variations.

**Table 2 Comparison of the values of FF among physical states and among wearing variations**

| Variables               |            | Ln (the values of FF) |             |        |
|-------------------------|------------|-----------------------|-------------|--------|
|                         |            | EMM                   | 95% CI      | p      |
| Physical states<br>(PS) | Resting    | 5.13                  | [4.54-5.71] | <0.001 |
|                         | Exercising | 4.62                  | [4.04-5.21] |        |

| tasks                                   |        |      |             |        |
|-----------------------------------------|--------|------|-------------|--------|
| Wearing variations (WV)                 | RPR_H  | 4.14 | [3.53-4.75] | <0.001 |
|                                         | RPR_K  | 2.29 | [1.67-2.90] |        |
|                                         | RPR_R  | 4.29 | [3.68-4.90] |        |
|                                         | PAPR_H | 6.20 | [5.59-6.81] |        |
|                                         | PAPR_K | 6.13 | [5.52-6.74] |        |
|                                         | PAPR_R | 6.22 | [5.61-6.83] |        |
| Interaction between PS and WV           |        |      |             | 0.795  |
| Post-hoc test: RPR_K<RPR_H/R<PAPR_H/K/R |        |      |             |        |

## Discussion

In this study, we measured the FF of the RPR and PAPR used in the resting state and exercise state, using three different wearing variations. The FF of the RPR and PAPR in the exercise state was significantly lower than that during the resting state. This may be because the adhesion between the face and the RPE tends to decrease due to the exercising tasks. There



was no significant interaction between the physical states and the wearing variations. It was suggested that even when workers wear RPE properly, working reduces respiratory protection. Since there is a possibility that working may impair protection, employers should try to reduce the risk by implementing engineering measures.

The FF of the PAPR used in the exercise state was greater than 100 in 9 of 10 cases for all wearing variations. There were three cases in which the FF of the RPR in the exercise state was greater than 100, using the recommended wearing method. There were no cases in which the FF of the RPR was greater than 100 when the knit cover was attached to the RPR. The inside of the PAPR was always under positive pressure, which may maintain respiratory protection even if working impairs the adhesion between the PAPR and the face. It is clear that PAPRs are superior to RPRs in terms of respiratory protection. However, it has been reported that PAPRs are rarely used in the workplace because <sup>5</sup> they are expensive, they are larger than RPRs, and most workers complained about their heaviness; <sup>11</sup> these reasons may have hindered the use of PAPR.

The mean FF of wearing a knit cover in RPRs was 12.3 in the resting state and 9.3 in the exercise state, which was significantly the lowest among all wearing methods. The FF was less than 100 in all participants, and this study also indicated that wearing a knit cover is a wearing method that can easily compromise the adhesion between the face and the RPR. <sup>12</sup>

When wearing a knit cover in PAPRs, the FF was more than 100 even during exercising tasks,

and respiratory protection was maintained. If there is a risk of causing eczema or other skin problems by wearing RPE, workers are allowed to use a knit cover as long as there is good adhesion between the RPE and the face.<sup>4</sup> Since this study showed that wearing a knit cover impairs adhesion to the RPR, it is recommended that workers with skin disorders who use a knit cover wear a PAPR.

There was no significant difference in the FF between the recommended method of wearing the RPR and the method of wearing the RPR over the helmet. In this study, we kept the pressure on the tightening cord constant among the participants, but there may be differences among individuals in the workplace. The RPR, PAPR, and helmet we examined were of one model and they were unused. In this case, the RPE headband merely fits well with the helmet, and it is unclear whether the results are similar for the other models. It is also unclear how the degradation of the RPR or helmet affects the fit of the headband and helmet. Further study is required on these points, and we cannot yet recommend wearing RPE over a helmet.

However, it has been reported that many workers in the workplace wore RPE over their helmets.<sup>5</sup> Working in a dusty environment while wearing RPE with a poorly adherent attachment does not sufficiently prevent pneumoconiosis. It is important to provide continuous education and guidance to workers to ensure that they wear RPE with minimal leakage.

Recently, the concept of workplace protection factor (WPF) has emerged because of the importance of evaluating the respiratory protection of RPE in the workplace environment.

WPF is a measure of the protection provided in the workplace when a properly functioning respirator is correctly fitted and used,<sup>13</sup> and several studies on WPF have been reported.<sup>14-18</sup>

In this study, respiratory protection during exercising tasks was evaluated in an artificial climate chamber, and it is desirable to evaluate the respiratory protection of various methods of wearing RPE in the workplace.

### **Limitations**

This study has some limitations. First, the number of participants was small, and type II errors may be larger, so we need to increase the sample size. Second, the RPRs, PAPRs, knit cover, and helmet we used were of only one type, so we thought it was necessary to verify with multiple types of RPE. Moreover, the RPE, knit cover, and helmet used were new. In the workplace, workers use the equipment for many years, so the deterioration of the silicone of the RPE, knit cover, and helmet may affect the FF. Third, participants may have worn the RPE more rigorously than the actual workers. To minimize the effect of the individual's ability to accurately fit the RPE, the participants wore the RPE while looking at a mirror reflection during the survey. If the examiner noticed an abnormality, such as a twisted strap, the participant was asked to remove the RPE and re-attach it. The verification of WPF in

actual workers without any advice on how to wear the RPE is a subject for future study.

## **Conclusion**

We evaluated the respiratory protection of RPRs and PAPRs during exercising tasks, using various wearing methods. The FF of RPRs in the exercise state was significantly lower than that in the resting state, indicating inadequate respiratory protection. In contrast, the FF of PAPRs was significantly lower than that at rest, but respiratory protection was maintained. As in a previous study, PAPRs were found to be superior to RPRs in terms of respiratory protection. Therefore, PAPRs are better than RPRs for workers who have to wear RPE inappropriately due to health problems.

## **Acknowledgements**

We would like to thank Editage (<http://www.editage.com>) for editing and reviewing this manuscript for English language.

## **Declaration of Conflict interests**

The authors declare no conflicts of interest.

## **Ethical approval**

The Ethics and Informed Consent Procedure for this study was approved by the Ethics Committee of Medical Research, University of Occupational and Environmental Health, Japan (Receipt No. H30-58). Informed consent was obtained from all the participants.

## **Funding**

This study was funded by the Industrial Disease Clinical Research Grants.

## **References**

1. Ministry of Health, Labour, and Welfare, Japan, Survey on Occurrence of Work-related Illnesses. (2019) (in Japanese), [https://www.mhlw.go.jp/stf/newpage\\_12883.html](https://www.mhlw.go.jp/stf/newpage_12883.html) (2019, accessed 18 March 2021).
2. Stobbe TJ, daRoza RA and Watkins MA. Facial hair and respirator fit: a review of the literature. *Am Ind Hyg Assoc J* 1988; 49: 199–204.
3. Floyd EL, Henry JB and Johnson DL. Influence of facial hair length, coarseness, and areal density on seal leakage of a tight-fitting half-face respirator. *J Occup Environ Hyg* 2018; 15: 334–340.
4. Ministry of Health Labour and Welfare, Labour Standards Bureau,, Japan, Labor Standards Bureau Notification No. 0207006: selection, and use of respiratory protection

equipment (in Japanese),

[https://www.mhlw.go.jp/web/t\\_doc?dataId=00tc2747&dataType=1&pageNo=1](https://www.mhlw.go.jp/web/t_doc?dataId=00tc2747&dataType=1&pageNo=1) (2005,

accessed 17 March 2021).

5. Shirasaka T, Ando H, Ikegami K, et al. A survey on methods of wearing respiratory protective equipment and awareness of respiratory protection among workers engaged in dust-generating work. *Environmental and Occupational Health Practice* 2019; 1: 39–45.

6. Sekoguchi S, Shirasaka T, Ando H, et al. Evaluation of the performance of replaceable particulate and powered air-purifying respirators considering non-recommended wearing methods. *Ind Health* 2020; 58: 573–580.

7. Ministry of Health Labour and Welfare J, Standard for Dust Mask (in Japanese),

<https://www.jniosh.johas.go.jp/icpro/jicosh-old/english/law/DustMask/index.html> (1988,

accessed 15 March 2021).

8. Japan Ministry of Health Labour and Welfare, Standard for Powered Air-Purifying

Respirator, <https://www.jaish.gr.jp/anzen/hor/hombun/hor1-11/hor1-11-39-1-0.htm> (2014,

accessed 15 March 2021).

9. Occupational Safety and Health Administration, Appendix A to §1910.134—Fit Testing

Procedures (Mandatory),

<https://www.osha.gov/laws-regs/regulations/standardnumber/1910/1910.134AppA> (2004,

accessed 10 March 2020).

10. Japanese Industrial Standards. Guidance for selection, use and maintenance of respiratory protective devices (JIS T 8150) (in Japanese), <https://kikakurui.com/t8/T8150-2006-01.html> (2006, 10 accessed March 2020).
11. Kishimoto T, Research on the practicality and diffusion of PAPR, Measurement of leakage rate and questionnaire survey for comparison between ordinary dust mask and Powered Air Purifying Respirator (PAPR) (in Japanese), [https://www.mhlw.go.jp/content/30\\_180302-01.pdf](https://www.mhlw.go.jp/content/30_180302-01.pdf) (accessed 26 March 2021).
12. Kikuzi K. A study on facepiece-to-face fitting of dust respirators. *J Science of Labour* 1984; 60: 559–568.
13. Janssen L, Zhuang Z and Shaffer R. Criteria for the collection of useful respirator performance data in the workplace. *J Occup Environ Hyg* 2014; 11: 218–226.
14. Myers WR, Zhuang Z and Nelson T. Field performance measurements of half-facepiece respirators--foundry operations. *Am Ind Hyg Assoc J* 1996; 57: 166–174.
15. Myers WR and Zhuang Z. Field performance measurements of half-facepiece respirators: steel mill operations. *Am Ind Hyg Assoc J* 1998; 59: 789–795.
16. Han DH. Correlations between workplace protection factors and fit factors for filtering facepieces in the welding workplace. *Ind Health* 2002; 40: 328–334.
17. Janssen LL, Nelson TJ and Cuta KT. Workplace protection factors for an N95 filtering facepiece respirator. *J Occup Environ Hyg* 2007; 4: 698-707.

18. Chazelet S, Wild P, Silvente E, et al. Workplace Respiratory Protection Factors during

Asbestos Removal Operations. *Ann Work Expo Health* 2018; 62: 613–621.
